# Supplementary material for: Myxoma Virus Expressing LIGHT (TNFSF14) Pre-Loaded into Adipose-Derived Mesenchymal Stem Cells Is Effective Treatment for Murine Pancreatic Adenocarcinoma
Source: Cancers (Basel). 2021 Mar 19;13(6):1394. doi: 10.3390/cancers13061394 (PMC8003548; doi:10.3390/cancers13061394)
Supplement: Supplementary file 1 [file cancers-13-01394-s001.pdf]

# Supplementary Materials: Myxoma virus expressing LIGHT (TNFSF14) pre-loaded into adipose-derived mesenchymal stem cells is effective treatment for murine pancreatic adenocarcinoma

Joanna Jazowiecka-Rakus, Agata Hadrys, Masmudur M. Rahman, Grant McFadden, Wojciech Fidyk, Ewa Chmielek, Marlena Pazdzior, Maciej Grajek, Violetta Kozik, Aleksander Sochanik

## Supplementary Information

1. *Mus musculus* tumor necrosis factor (ligand) superfamily, member 14 (Tnfsf14) cDNA (NCBI Reference Sequence: NM\_019418.3)

```
ATGGAGAGTGTGGTACAGCCTTCAGTGTTTGTGGTGGATGGACAGACGGACATCCCATTTCAGGCGGCTGGAA
CAGAACCACCGGAGACGGCGCTGTGGCACTGTCCAGGTCAGCCTGGCCCTGGTGCTGCTGCTAGGTGCTGGG
CTGGCCACTCAGGGCTGGTTTCTCCTGAGACTGCATCAACGTCTTGGAGACATAGTAGCTCATCTGCCAGATG
GAGGCAAAGGCTCCTGGGAGAAGCTGATACAAGATCAACGATCTCACCAGGCCAACCCAGCAGCACATCTT
ACAGGAGCCAACGCCAGCTTGATAGGTATTGGTGGACCTCTGTTATGGGAGACACGACTTGGCCTGGCCTTCT
TGAGGGGCTTGACGTATCATGATGGGGCCCTGGTGACCATGGAGCCCGGTTACTACTATGTGTACTCCAAAGT
GCAGCTGAGCGGCGTGCGGCTGCCCCAGGGGCTGGCCAATGGCCTCCCCATCACCCATGGACTATACAAGCG
CACATCCCGCTACCCGAAGGAGTTAGAACTGCTGGTCAGTCGGCGGTACCCCTGTGGCCGGGCCAACAGCTC
CCGAGTCTGGTGGGACAGCAGCTTCCTGGGCGGCGTGGTACATCTGGAGGCTGGGGAAGAGGTGGTGGTCCG
CGTGCCTGGAAACCGCCTGGTCAGACCACGTGACGGCACCAGGTCCTATTTCGGAGCTTTCATGGTCTGA
```

## 2. vMyx-mLIGHT-Fluc/tdTr Recombinant Virus

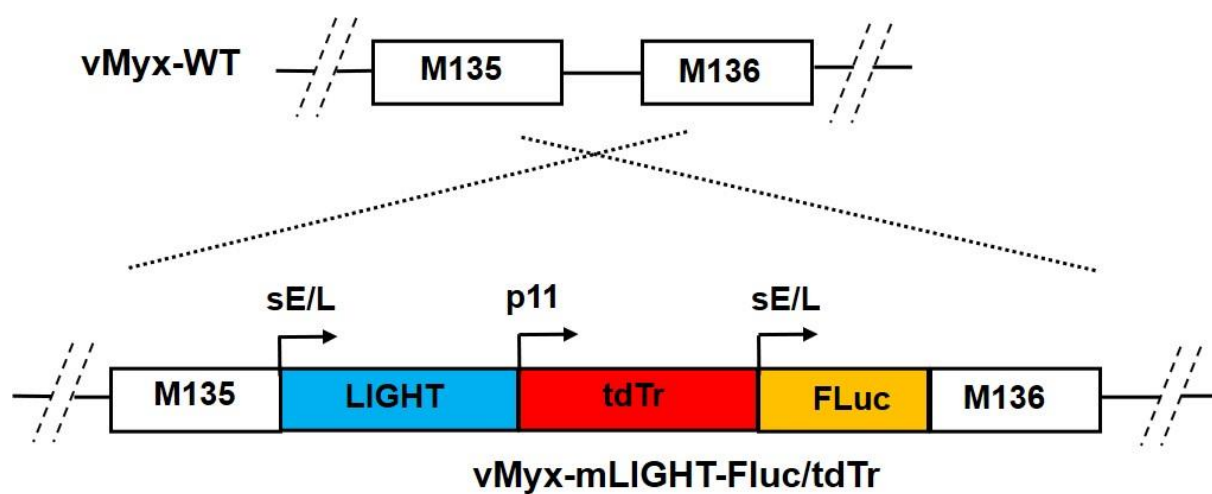

**Figure S1.** Schematic design showing the organization and recombination region of vMyx-mLIGHT-Fluc/tdTr. This recombinant MYXV expresses murine LIGHT under a poxvirus synthetic early/late promoter (sE/L), tdTomato red (tdTr) under a poxvirus late p11 promoter, and firefly luciferase (Fluc) under a sE/L promoter, all inserted between M135 and M136 genes.

### 3. RNA Isolation, cDNA Synthesis and RT-qPCR

Total RNA was isolated from infected (with vMyx-mLIGHT-Fluc/tdTr or vMyx-WT; MOI = 5) and non-infected ADSC cultures using RNeasy Mini Kit (Qiagen) according to the manufacturer's instructions. Synthesis of cDNA was performed from 250 ng of total RNA using the High-Capacity cDNA Reverse Transcription Kit (Applied Biosystems) according to the manufacturer's instructions. RT-qPCR reactions were performed in duplicate for each sample using a reaction mix prepared as follows: 1×SYBR Select Master Mix (Applied Biosystems), 2 µL of primers (forward 5'-GGAGACATAGTAGCTCATCTGCC-3' and reverse 5'-CCACCAATACCTATCAAGCTGGC-3'; 1 µM each), and 4.0 µL of 20× diluted cDNA in a final volume of 15 µL. The amplification protocol included an initial preheating at 50 °C for 2 min, initial denaturation at 95 °C for 2 min, and 40 cycles of amplification (95 °C for 15 s and 60 °C for 60 s). Melting curve analyses were performed at the end of each run. RT-qPCR was carried out with a Rotor-Gene Q (Qiagen, Hilden, Germany). Constitutive expression of *Light* was rendered as a ratio of target gene (*Light*) vs. reference gene (glyceraldehyde 3-phosphate dehydrogenase - *GAPDH*) using the Pfaffl method [1].

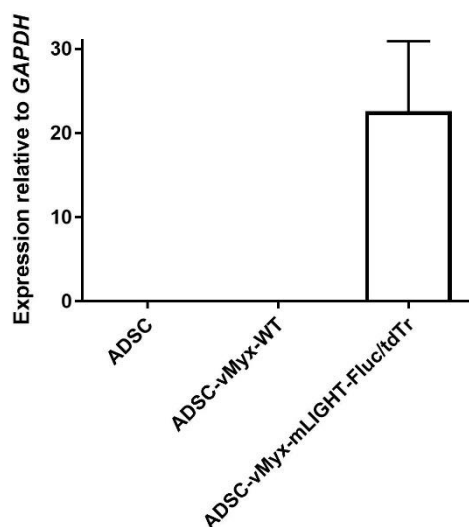

**Figure S2.** Constitutive expression of *Light* in infected and non-infected ADSCs. The gene transcript was measured using RT-qPCR in non-infected ADSCs or ADSCs infected with either vMyx-mLIGHT-Fluc/tdTr or with vMyx-WT. The data show mean ± SD of two independent experiments.

#### 4. Immunofluorescence

HeLa cells ( $5 \times 10^5$ /dish) were seeded on the bottom of 35-mm glass Petri dishes. Next day cells were infected with vMyx-mLIGHT-FLuc/tdTr (MOI = 3). After 24 h post infection, cells were washed three times with PBS<sup>-</sup>, fixed with 2% paraformaldehyde in PBS<sup>-</sup> (12 min/RT), washed again three times with PBS<sup>-</sup> and permeabilized with Triton X-100 in PBS<sup>-</sup> (0.1% / 90 sec /RT). Cells were then washed three times with PBS<sup>-</sup> and blocked with 3% BSA in PBS<sup>-</sup> (30 min/37 °C). Next, cells were incubated with primary rabbit polyclonal antibody (1:300 dilution) against LIGHT (Santa Cruz Biotechnology, FL-240) for 30 min at 37 °C. Cells were then washed six times with PBS<sup>-</sup> and incubated with secondary antibody conjugated to Alexa Fluor 488 Goat anti-rabbit (Thermo Fisher Scientific). Finally, cells were washed six times with PBS<sup>-</sup> and mounted on glass slides with VECTASHIELD® (Vectorlabs) containing DAPI (4',6-diamidino-2-phenylindole) to stain nuclear DNA and viral factory. Micrographs were taken using a Leica fluorescence microscope.

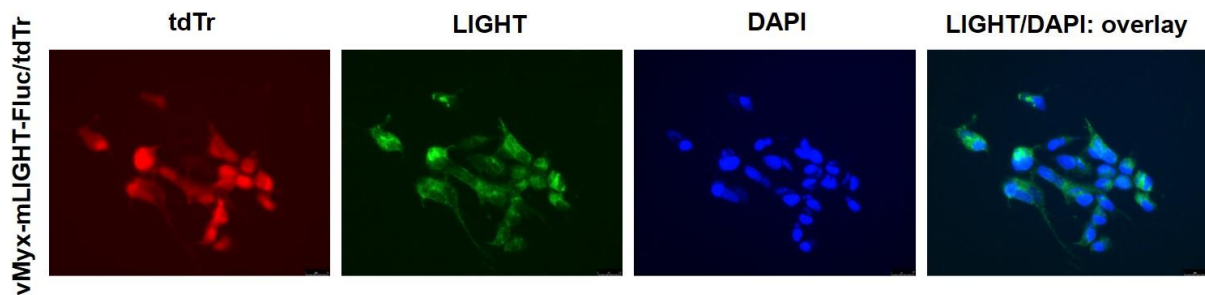

**Figure S3.** Expression and localization of murine LIGHT in cells infected with vMyx-mLIGHT-FLuc/tdTr. HeLa cells were infected with vMyx-mLIGHT-FLuc/tdTr (MOI = 3). After 24 h p.i., cells were fixed and stained with antibody against LIGHT. Nuclei were stained with DAPI. Micrographs were taken using a Leica fluorescence microscope.

## 5. Comparison of Intravenous *vs.* Intraperitoneal Delivery of ADSC-Shielded MYXV or Unshielded MYXV

C57BL/6 mice ( $n = 3$ ) were orthotopically injected (day 0) with  $1 \times 10^6$  Pan02 cells suspended in 30  $\mu\text{L}$  PBS<sup>-</sup>. Seven days after implantation, mice were intraperitoneally injected with a single dose of ADSCs infected for 24 h (MOI = 5) with vMyx-mLIGHT-Fluc/tdTr ( $5 \times 10^5$  cells suspended in 100  $\mu\text{L}$  PBS<sup>-</sup>) or with unshielded vMyx-mLIGHT-Fluc/tdTr ( $5 \times 10^5$  FFU/100  $\mu\text{L}$  PBS<sup>-</sup>). Bioluminescence imaging (BLI) of luciferase reporter gene expression was performed using Lumina IVIS Imaging System (PerkinElmer). At the 3-h time point p.i. mice were intraperitoneally injected with 1.5 mg D-luciferin (Promega) and bioluminescence images were acquired. Measurements in intact animals were immediately followed by examination of dissected organs (pancreas, spleen, liver, lungs, heart, kidneys, stomach and duodenum).

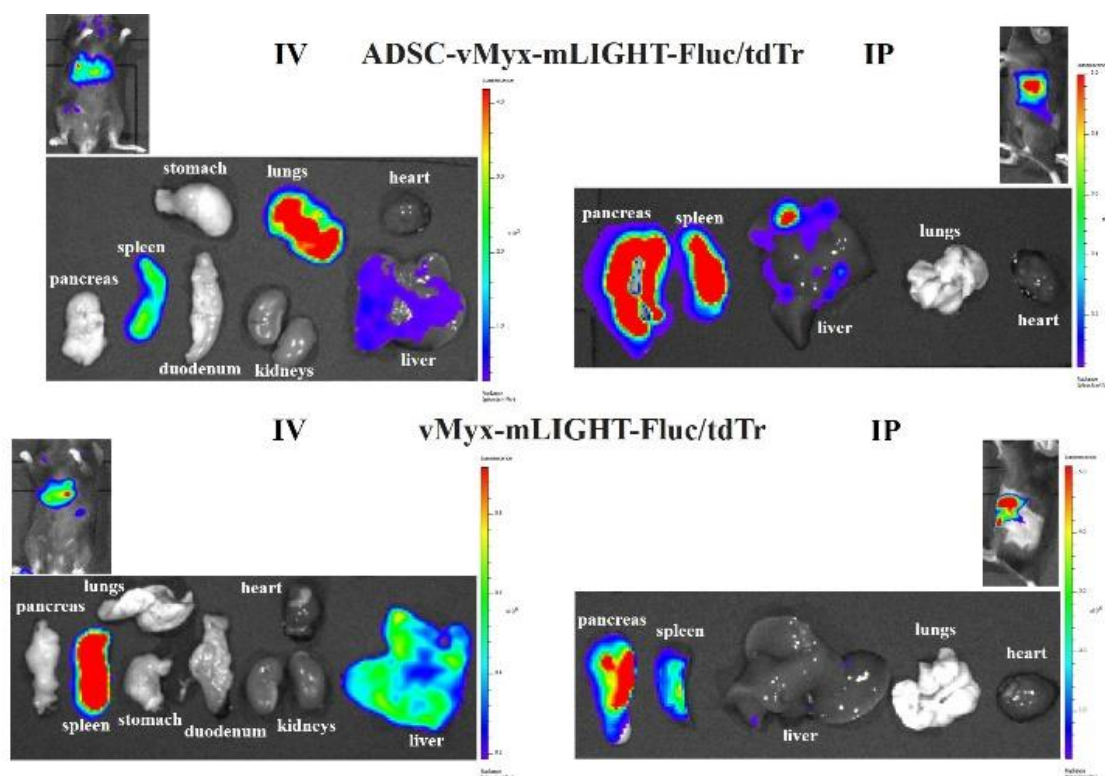

**Figure S4.** Effect of intraperitoneal *vs.* intravenous injection of MYXV construct (vMyx-mLIGHT-Fluc/tdTr) on biodistribution in mice. Bioluminescence (BLI) images were acquired in orthotopic pancreatic adenocarcinoma-bearing mice (+Pan02) at 3-h timepoint post injection (either IV or IP) of unshielded or ADSC-shielded MYXV construct (vMyx-mLIGHT-Fluc/tdTr); intact mice and dissected organs (pancreas, spleen, liver, lungs, heart, kidneys, stomach and duodenum) were examined. BLI expressed as radiance (photons/sec/cm²/sr). Different radiance scales shown to cover the whole span of bioluminescence ( $n = 3$ /group).

## 6. Histological appearance of representative H&E-stained tissue sections

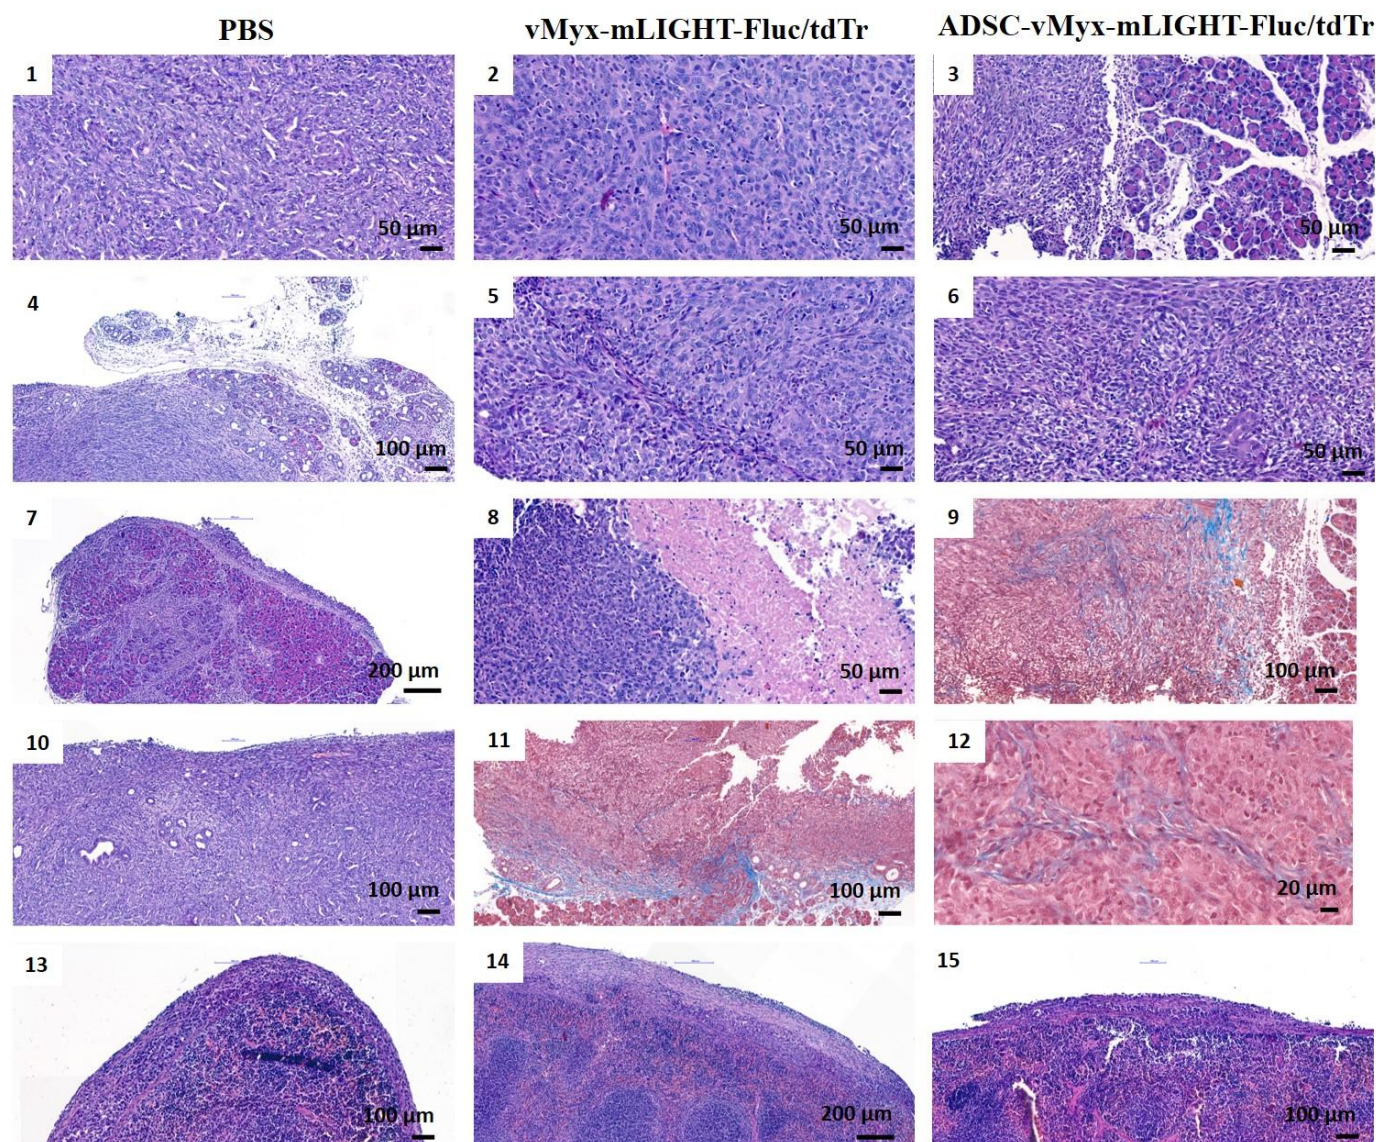

**Figure S5.** Histological appearance of representative H&E-stained tissue sections. Sections were obtained from the material collected on the 21<sup>st</sup> day of therapeutic experiment using LIGHT-expressing MYXV construct, either ADSC-shielded or unshielded (see Results; Figure 6). /1-2/ atypical mitoses; /3-4/ lymphocytic infiltrates; /5/ cells with hyperchromatic nucleus; /6/ tumor with less cellularity; /7/ tumor invading acinar cells; /8/ tumor necrosis; /9/ growth of connective tissue strands with reduced cellularity; /10/ Tumor surrounding interlobular ducts; /11/ connective tissue strands at the tumor periphery (Masson's staining); /12/ connective tissue strands with a stream pattern located next to cells (Masson's staining); /13-15/ infiltration of the spleen capsule; scale bars: 20-200 μm.

7. The source of adipose tissue-derived mesenchymal stem cells.

**Table S1.** The source of adipose tissue-derived mesenchymal stem cells.

| Adipose Tissue Donors | Sex    | Age | Reason for Surgery                                                              |
|-----------------------|--------|-----|---------------------------------------------------------------------------------|
| Donor #1              | male   | 40  | Trauma-related reconstructive surgery *; free soft tissue flaps, abdominal area |
| Donor #2              | female | 35  | Trauma-related reconstructive surgery *; free soft tissue flaps, abdominal area |
| Donor #3              | female | 43  | Trauma-related reconstructive surgery *; free soft tissue flaps, abdominal area |

\* donors were not subjected to chemotherapy or radiotherapy.

**Reference**

1. Pfaffl, M.W. A new mathematical model for relative quantification in real-time RT-PCR. *Nucleic Acids Res* **2001**, 29, e45.
